# Supplementary material for: Switching on thermal and light-induced spin crossover by desolvation of [Fe(3-bpp)2](XO4)2·solvent (X = Cl, Re) compounds
Source: Royal Society of Chemistry journal article supplement (doi:10.1039/d1qi00446h), 2021-01-01
Supplement: d1qi00446h1.pdf [file d1qi00446h1.pdf]

## Electronic supplementary information (ESI)

### Switching on thermal and light-induced spin crossover by desolvation of the $[\text{Fe}(\text{3-bpp})_2](\text{XO}_4)_2 \cdot \text{solvent}$ ( $\text{X} = \text{Cl}, \text{Re}$ ) compounds

Abdelhak Djemel,<sup>a,b</sup> Olaf Stefanczyk,<sup>\*a,c</sup> Cédric Desplanches,<sup>a</sup> Kunal Kumar,<sup>c</sup> Rachid Delimi,<sup>d</sup> Farouk Benaceur,<sup>b</sup> Shin-ichi Ohkoshi,<sup>c</sup> and Guillaume Chastanet<sup>\*a</sup>

<sup>a</sup> CNRS, Univ. Bordeaux, Bordeaux INP, ICMCB, UMR 5026, 87 avenue du Dr. A. Schweitzer, Pessac, F-33608 (France).

<sup>b</sup> Research Unit of Medicinal Plants (RUMP), University Pole No 02, Laghouat 3000, attached to Biotechnology Research Center (CRBt), UV 03 BP E73 Ali Mendjeli New Town, Constantine 25000 (Algeria).

<sup>c</sup> Department of Chemistry, School of Science The University of Tokyo, 7-3-1 Hongo, Bunkyo-ku, Tokyo 113-0033 (Japan).

<sup>d</sup> Badji Mokhtar University, Laboratory of Water Treatment and Valorization of Industrial Waste, BP 12, Annaba 23000 (Algeria).

E-mail OS: [olaf@chem.s.u-tokyo.ac.jp](mailto:olaf@chem.s.u-tokyo.ac.jp). E-mail GS: [guillaume.chastanet@icmcb.cnrs.fr](mailto:guillaume.chastanet@icmcb.cnrs.fr).

#### Contents

|                                                                                                                                                                                                                                                                                                                                                                                                                                                                                                                                                                                                                                                                                                                                                                                                            |           |
|------------------------------------------------------------------------------------------------------------------------------------------------------------------------------------------------------------------------------------------------------------------------------------------------------------------------------------------------------------------------------------------------------------------------------------------------------------------------------------------------------------------------------------------------------------------------------------------------------------------------------------------------------------------------------------------------------------------------------------------------------------------------------------------------------------|-----------|
| <b>Thermogravimetry</b> .....                                                                                                                                                                                                                                                                                                                                                                                                                                                                                                                                                                                                                                                                                                                                                                              | <b>2</b>  |
| <b>Figure S1.</b> Thermogravimetric analyses of <b>1·sol</b> (a) and <b>2·sol</b> (b). Insets contain the first derivatives of the TGA curves (DTG). .....                                                                                                                                                                                                                                                                                                                                                                                                                                                                                                                                                                                                                                                 | <b>2</b>  |
| <b>Pictures of samples – desolvation induced colors changes</b> .....                                                                                                                                                                                                                                                                                                                                                                                                                                                                                                                                                                                                                                                                                                                                      | <b>3</b>  |
| <b>Figure S2.</b> Pictures of <b>1·sol</b> and <b>2·sol</b> under different conditions: (a) freshly collected crystals, (b) crystallites after 5 min at 25°C, (c) samples just after heating to 120°C, (d) crystallites after 30 min at 120°C, (e) powdered samples for a total of 35 min at 120°C, and (f) powdered samples for a total of 90 min at 120°C. ....                                                                                                                                                                                                                                                                                                                                                                                                                                          | <b>3</b>  |
| <b>Figure S3.</b> Room temperature pictures of <b>1·sol</b> and <b>2·sol</b> spread on cellulose paper for the fresh sample, after 24 hours in air at ambient conditions and after 2 hours of heating at 120°C. ....                                                                                                                                                                                                                                                                                                                                                                                                                                                                                                                                                                                       | <b>3</b>  |
| <b>Infrared (IR) spectroscopy</b> .....                                                                                                                                                                                                                                                                                                                                                                                                                                                                                                                                                                                                                                                                                                                                                                    | <b>4</b>  |
| <b>Figure S4.</b> Infrared (IR) absorption spectra in KBr of 3-bpp, $\text{NaClO}_4 \cdot \text{H}_2\text{O}$ , $\text{KReO}_4$ , <b>1·sol</b> and <b>2·sol</b> (pristine, after 24 h in air at ambient conditions, and 2 h heated at 120°C) in: (a) the 4000 – 400 $\text{cm}^{-1}$ range, and (b) the fingerprint region with assignment. ....                                                                                                                                                                                                                                                                                                                                                                                                                                                           | <b>4</b>  |
| <b>Ultraviolet-visible-near infrared (UV-vis-NIR) spectroscopy</b> .....                                                                                                                                                                                                                                                                                                                                                                                                                                                                                                                                                                                                                                                                                                                                   | <b>5</b>  |
| <b>Figure S5.</b> Room temperature solid-state UV-Vis-NIR absorption (Kubelka–Munk function) spectra with assignment of 3-bpp, $\text{NaClO}_4 \cdot \text{H}_2\text{O}$ , $\text{KReO}_4$ , <b>1·sol</b> (a) and <b>2·sol</b> (b) (pristine, after 24 h in dry air, and 2 h heated at 120°C) dispersed in $\text{BaSO}_4$ . ....                                                                                                                                                                                                                                                                                                                                                                                                                                                                          | <b>5</b>  |
| <b>Computational details</b> .....                                                                                                                                                                                                                                                                                                                                                                                                                                                                                                                                                                                                                                                                                                                                                                         | <b>6</b>  |
| <b>Figure S6.</b> Models of <b>A</b> (a), <b>B</b> (b) and <b>C</b> (c) used for quantum chemical calculations. ....                                                                                                                                                                                                                                                                                                                                                                                                                                                                                                                                                                                                                                                                                       | <b>6</b>  |
| <b>Figure S7.</b> Calculated UV-vis spectra of <b>1·sol</b> (green), <b>2·sol</b> (blue), and $[\text{Fe}(\text{3-bpp})_2][\text{Au}(\text{CN})_2]_2 \cdot 2\text{H}_2\text{O}$ (red) base on models <b>A</b> , <b>B</b> and <b>C</b> , respectively. Bars indicate relative probability of electronic transitions. ....                                                                                                                                                                                                                                                                                                                                                                                                                                                                                   | <b>7</b>  |
| <b>Figure S8.</b> The energy level diagram with Fe <i>d</i> -based representative low spin molecular orbitals calculated for <b>1·sol</b> and <b>2·sol</b> . ....                                                                                                                                                                                                                                                                                                                                                                                                                                                                                                                                                                                                                                          | <b>8</b>  |
| List of excited state calculated for LS Fe(II)-based model <b>A</b> taken from complex <b>1·sol</b> . ....                                                                                                                                                                                                                                                                                                                                                                                                                                                                                                                                                                                                                                                                                                 | <b>8</b>  |
| List of excited state calculated for LS Fe(II)-based model <b>B</b> taken from complex <b>2·sol</b> . ....                                                                                                                                                                                                                                                                                                                                                                                                                                                                                                                                                                                                                                                                                                 | <b>10</b> |
| <b>Figure S9.</b> The energy level diagram with Fe <i>d</i> -based representative high spin molecular orbitals calculated for input file taken from reference R2. ....                                                                                                                                                                                                                                                                                                                                                                                                                                                                                                                                                                                                                                     | <b>13</b> |
| List of excited state calculated for HS Fe(II)-based model <b>C</b> taken from reference R2. ....                                                                                                                                                                                                                                                                                                                                                                                                                                                                                                                                                                                                                                                                                                          | <b>14</b> |
| <b>Single crystal X-ray diffraction (SCXRD) studies</b> .....                                                                                                                                                                                                                                                                                                                                                                                                                                                                                                                                                                                                                                                                                                                                              | <b>17</b> |
| <b>Table S1.</b> Selected crystallographic parameters for <b>1·sol</b> and <b>2·sol</b> . ....                                                                                                                                                                                                                                                                                                                                                                                                                                                                                                                                                                                                                                                                                                             | <b>17</b> |
| <b>Table S2.</b> Selected bond lengths and angles for <b>1·sol</b> and <b>2·sol</b> . ....                                                                                                                                                                                                                                                                                                                                                                                                                                                                                                                                                                                                                                                                                                                 | <b>17</b> |
| <b>Figure S10.</b> Packing along crystallographic directions (100) (a for <b>1·sol</b> and b for <b>2·sol</b> ), (010) (c for <b>1·sol</b> and d for <b>2·sol</b> ), and (001) (e for <b>1·sol</b> and f for <b>2·sol</b> ) including a hydrogen bond networks. ....                                                                                                                                                                                                                                                                                                                                                                                                                                                                                                                                       | <b>18</b> |
| <b>Powder X-ray diffraction (PXRD) studies</b> .....                                                                                                                                                                                                                                                                                                                                                                                                                                                                                                                                                                                                                                                                                                                                                       | <b>19</b> |
| <b>Figure S11.</b> (a) Experimental PXRD patterns of <b>1·sol</b> (pristine, after 24 h in dry air, and 2 h heated at 120°C) and calculated from single-crystal X-ray diffraction data including texture effect with preferred platy orientation along (002) direction with March-Dollase parameter $M/D = 0.6$ ( <b>1·sol</b> *). (b) Time-evolution of diffractograms of pristine <b>1·sol</b> . (c) Time-evolution of PXRD patterns of desolvated <b>1</b> (2 h heated at 120°C). (d) Experimental PXRD patterns of <b>2·sol</b> (pristine and 2 h heated at 120°C) and calculated from single-crystal X-ray diffraction data ( <b>2·sol</b> *). (e) Time-evolution of diffractograms of pristine <b>2·sol</b> . (f) Time-evolution of PXRD patterns of desolvated <b>2</b> (2 h heated at 120°C). .... | <b>19</b> |
| <b>Photomagnetic properties</b> .....                                                                                                                                                                                                                                                                                                                                                                                                                                                                                                                                                                                                                                                                                                                                                                      | <b>20</b> |
| <b>Figure S12.</b> Time dependence of $\chi_M T$ at $H_{dc} = 10$ kOe during excitation at 10 K with 650 nm light ( $P = 5$ mW/cm <sup>2</sup> ) for pristine ( <b>1·sol</b> ) and desolvated phases ( <b>1</b> and <b>2</b> ). ....                                                                                                                                                                                                                                                                                                                                                                                                                                                                                                                                                                       | <b>20</b> |

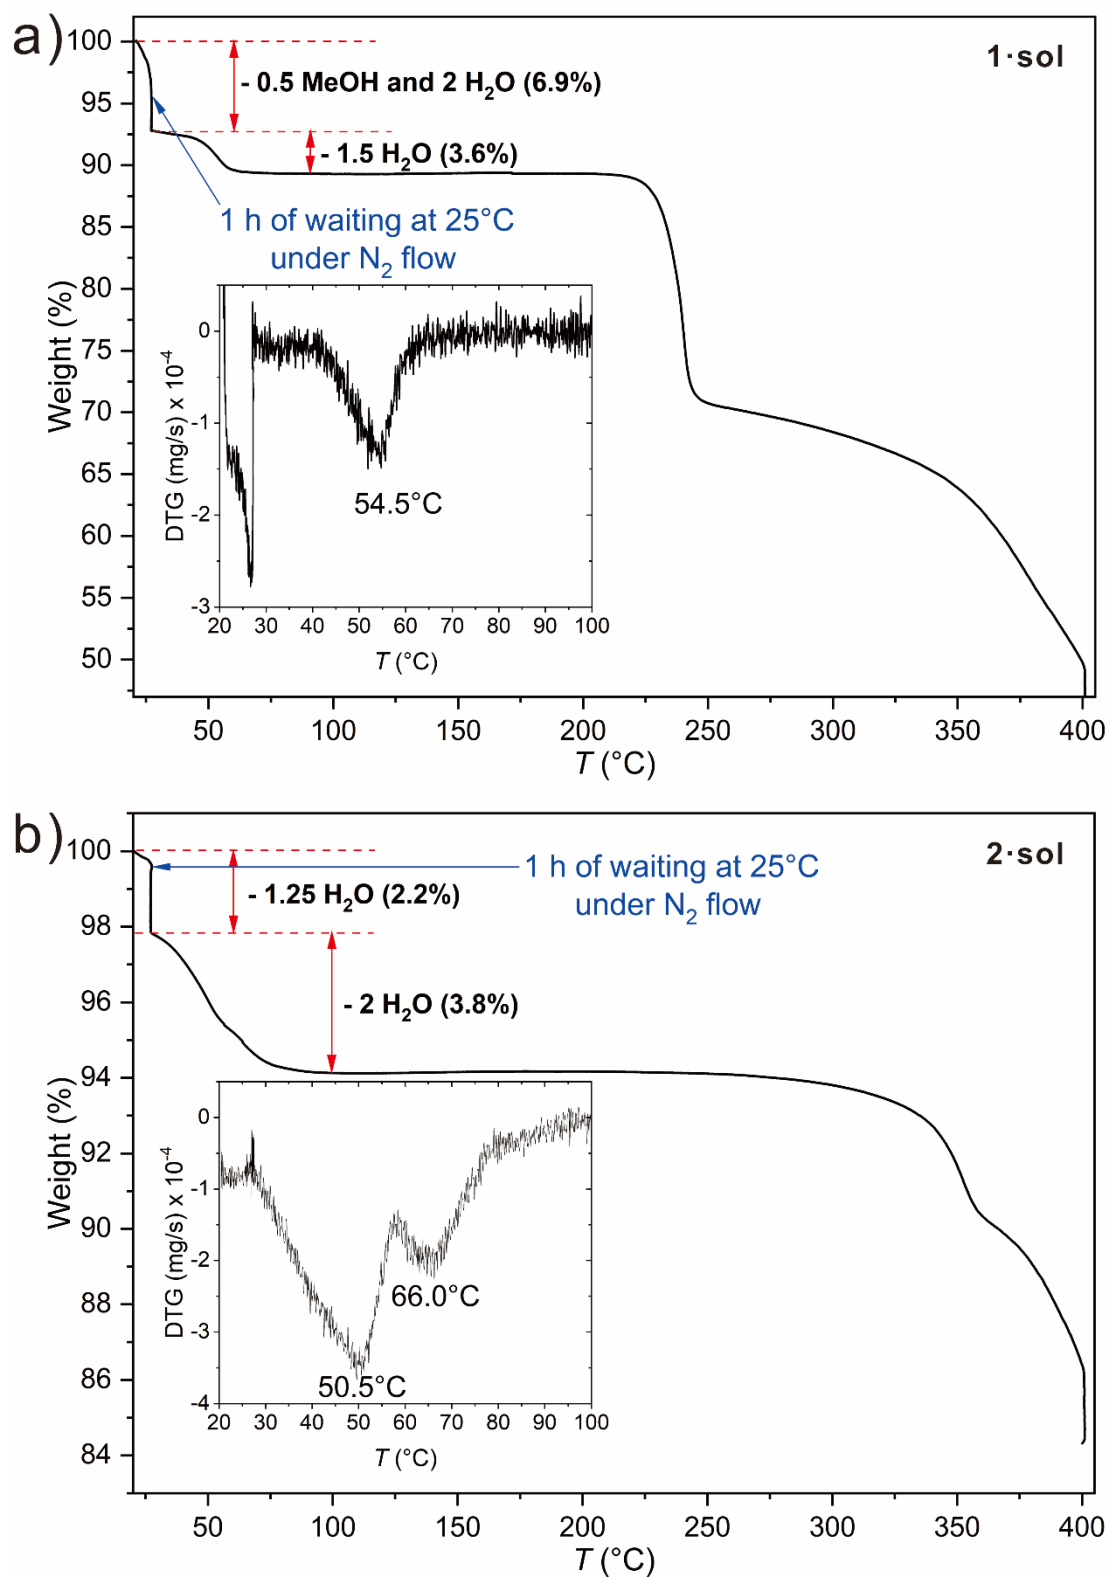

**Figure S1.** Thermogravimetric analyses of **1-sol** (a) and **2-sol** (b). Insets contain the first derivatives of the TGA curves (DTG).

## Pictures of samples – desolvation induced colors changes

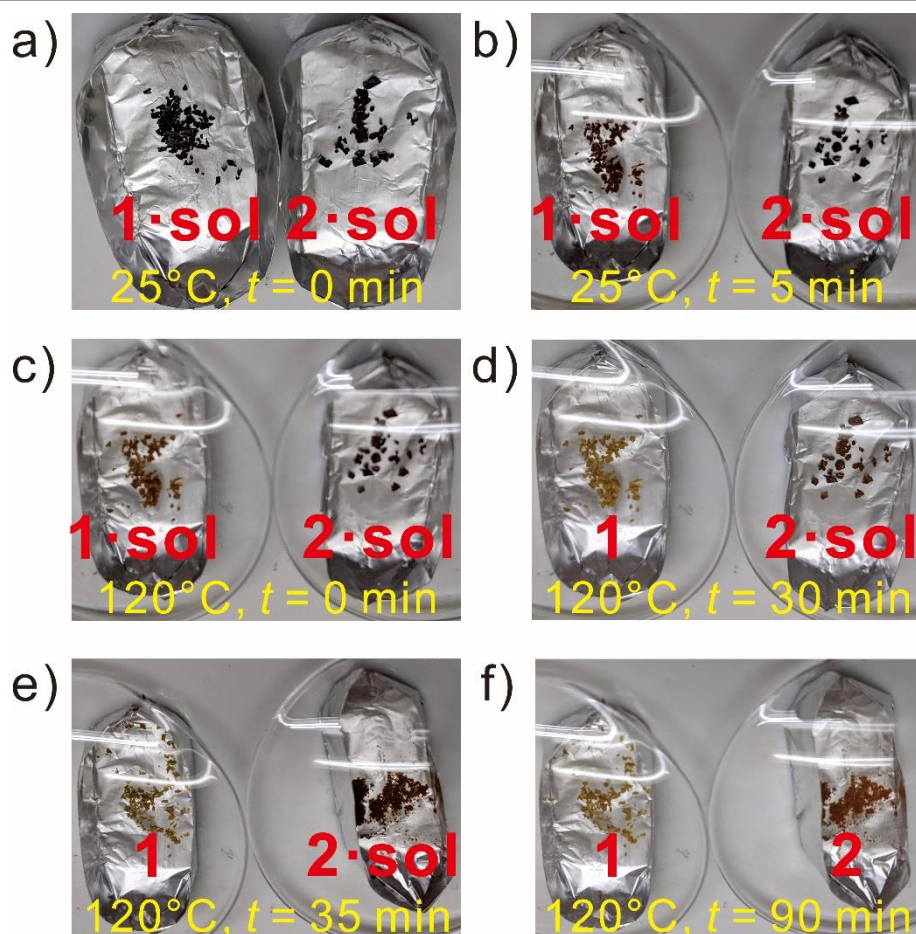

**Figure S2.** Pictures of 1·sol and 2·sol under different conditions: (a) freshly collected crystals, (b) crystallites after 5 min at 25°C, (c) samples just after heating to 120°C, (d) crystallites after 30 min at 120°C, (e) powdered samples for a total of 35 min at 120°C, and (f) powdered samples for a total of 90 min at 120°C.

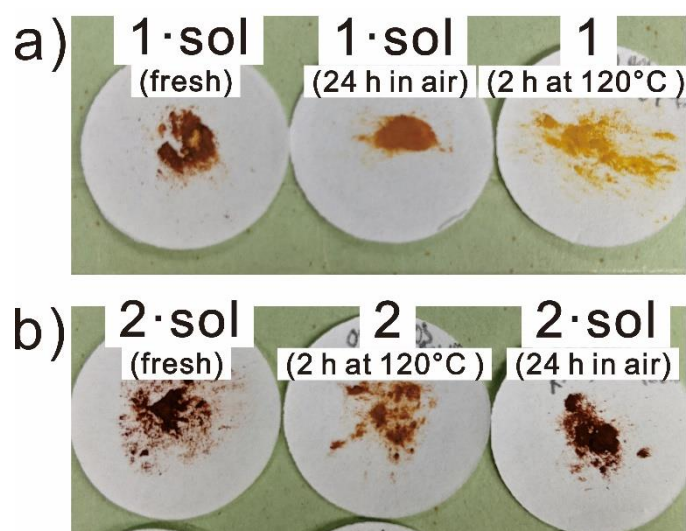

**Figure S3.** Room temperature pictures of 1·sol and 2·sol spread on cellulose paper for the fresh sample, after 24 hours in air at ambient conditions and after 2 hours of heating at 120°C.

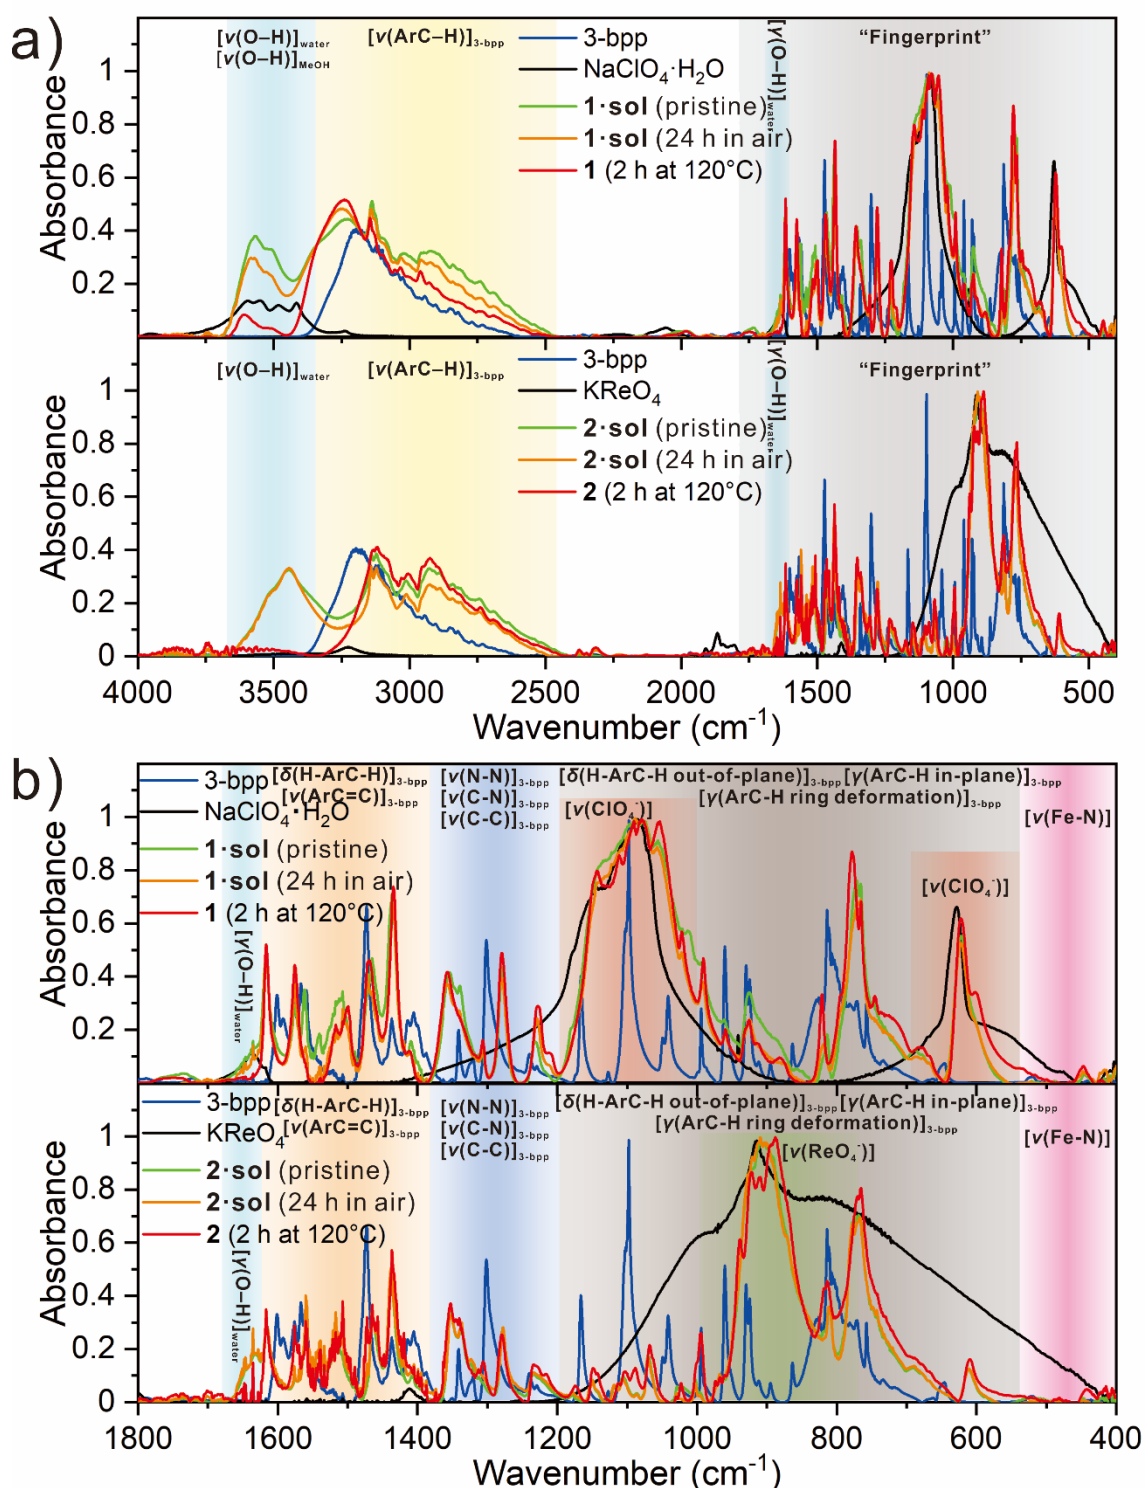

**Figure S4.** Infrared (IR) absorption spectra in KBr of 3-bpp,  $\text{NaClO}_4 \cdot \text{H}_2\text{O}$ ,  $\text{KReO}_4$ , 1·sol and 2·sol (pristine, after 24 h in air at ambient conditions, and 2 h heated at 120°C) in: (a) the 4000 – 400  $\text{cm}^{-1}$  range, and (b) the fingerprint region with assignment.

## Ultraviolet-visible-near infrared (UV-vis-NIR) spectroscopy

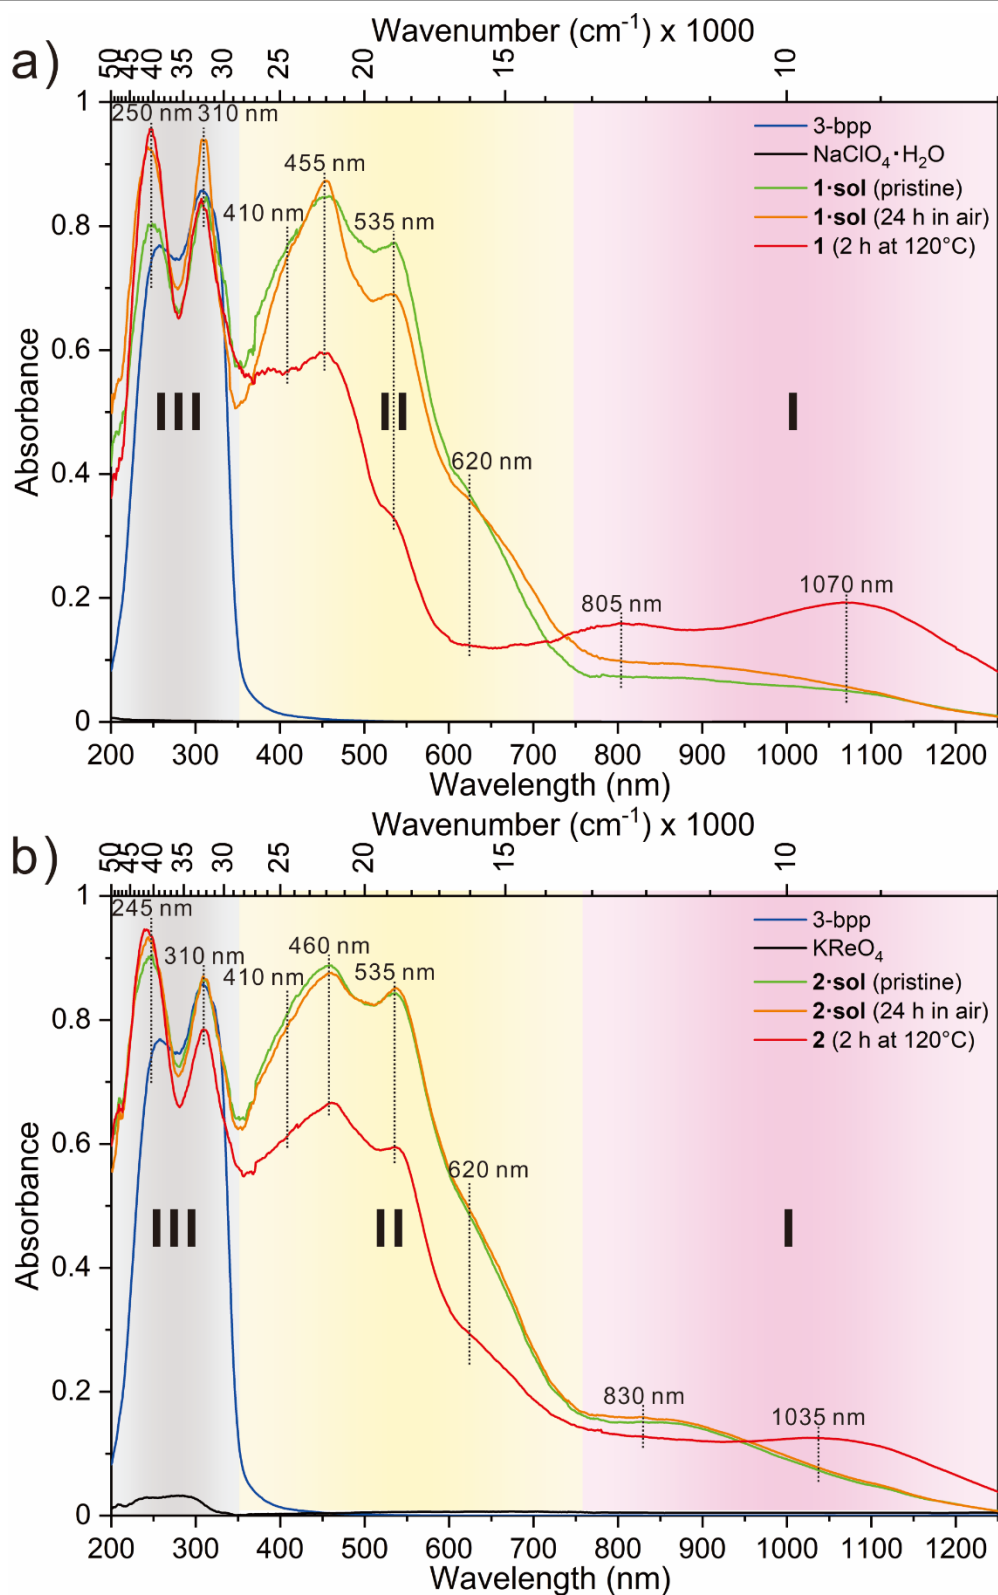

**Figure S5.** Room temperature solid-state UV-Vis-NIR absorption (Kubelka-Munk function) spectra with assignment of 3-bpp,  $\text{NaClO}_4 \cdot \text{H}_2\text{O}$ ,  $\text{KReO}_4$ , 1·sol (a) and 2·sol (b) (pristine, after 24 h in dry air, and 2 h heated at 120°C) dispersed in  $\text{BaSO}_4$ .

## Computational details

Quantum chemical calculations were done using Gaussian 16 software.<sup>R1</sup> Input files were prepared based on the crystal structure of **1·sol** (90 K) and **2·sol** (250 K), and  $[\text{Fe}(\text{3-bpp})_2][\text{Au}(\text{CN})_2]_2 \cdot 2\text{H}_2\text{O}$  (440 K)<sup>R2</sup> by removing the solvents and anions forming model **A**, **B** and **C** (**Figure S6**). The single point DFT and TD-DFT calculations were performed with B3LYP functionals, using Karlsruhe type def2-SVP basis set for C, N and H atoms and triple-zeta def2-TZVP basis set for Fe(II) center.<sup>R3,R4</sup> The calculation yielded model **A** and **B** with low spin (LS) configuration with similar UV-Vis-NIR spectra (**Figure S7**) and molecular orbitals (**Figure S8**), and model **C** with complete high spin (HS) configuration (**Figure S9**). Ground state to lowest 100 electronic excited states were calculated with oscillator strength magnetic moment and constituting molecular orbitals. The molecular arrangements for relevant excited levels are presented below for all three models.

## References

- R1.** Gaussian 16, Revision B.01, M. J. Frisch, G. W. Trucks, H. B. Schlegel, G. E. Scuseria, M. A. Robb, J. R. Cheeseman, G. Scalmani, V. Barone, G. A. Petersson, H. Nakatsuji, X. Li, M. Caricato, A. V. Marenich, J. Bloino, B. G. Janesko, R. Gomperts, B. Mennucci, H. P. Hratchian, J. V. Ortiz, A. F. Izmaylov, J. L. Sonnenberg, D. Williams-Young, F. Ding, F. Lipparini, F. Egidi, J. Goings, B. Peng, A. Petrone, T. Henderson, D. Ranasinghe, V. G. Zakrzewski, J. Gao, N. Rega, G. Zheng, W. Liang, M. Hada, M. Ehara, K. Toyota, R. Fukuda, J. Hasegawa, M. Ishida, T. Nakajima, Y. Honda, O. Kitao, H. Nakai, T. Vreven, K. Throssell, J. A. Montgomery, Jr., J. E. Peralta, F. Ogliaro, M. J. Bearpark, J. J. Heyd, E. N. Brothers, K. N. Kudin, V. N. Staroverov, T. A. Keith, R. Kobayashi, J. Normand, K. Raghavachari, A. P. Rendell, J. C. Burant, S. S. Iyengar, J. Tomasi, M. Cossi, J. M. Millam, M. Klene, C. Adamo, R. Cammi, J. W. Ochterski, R. L. Martin, K. Morokuma, O. Farkas, J. B. Foresman, and D. J. Fox, Gaussian, Inc., Wallingford CT, 2016.
- R2.** A. Djemel, O. Stefanczyk, M. Marchivie, E. Trzop, E. Collet, C. Desplanches, R. Delimi and G. Chastanet, Solvatomorphism-Induced 45 K Hysteresis Width in a Spin-Crossover Mononuclear Compound, *Chem. Eur. J.*, 2018, **24**, 14760-14767.
- R3.** F. Weigend and R. Ahlrichs, Balanced basis sets of split valence, triple zeta valence and quadruple zeta valence quality for H to Rn: Design and assessment of accuracy, *Phys. Chem. Chem. Phys.*, 2005, **7**, 3297-3305.
- R4.** A. Schaefer, C. Huber and R. Ahlrichs, Fully optimized contracted Gaussian basis sets of triple zeta valence quality for atoms Li to Kr, *J. Chem. Phys.*, 1994, **100**, 5829.

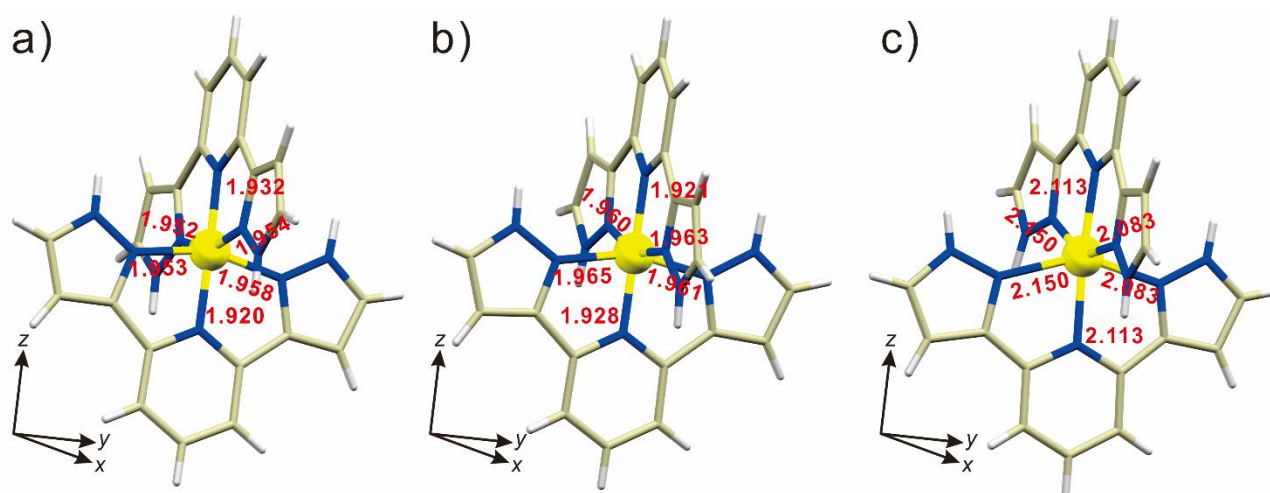

**Figure S6.** Models of **A** (a), **B** (b) and **C** (c) used for quantum chemical calculations. Legend: C – grey, Fe – yellow, H – white, and N – blue. Red numbers indicate bond lengths in the first coordination sphere of Fe(II) center.

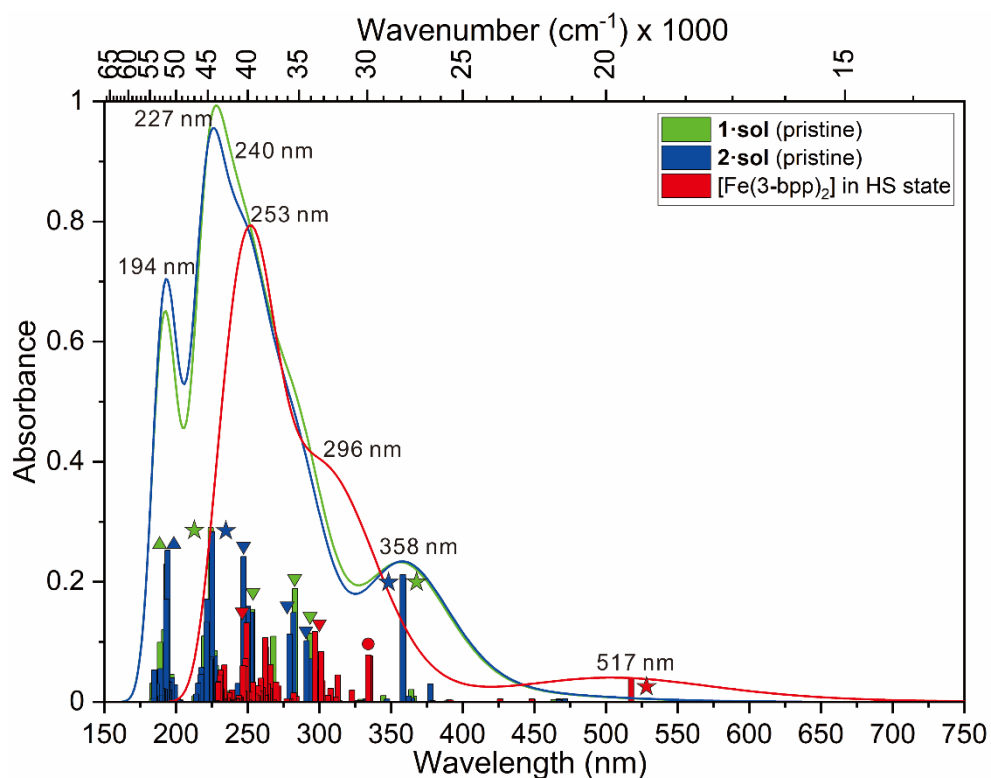

**Figure S7.** Calculated UV-vis spectra of **1-sol** (green), **2-sol** (blue), and  $[\text{Fe}(\text{3-bpp})_2][\text{Au}(\text{CN})_2]_2 \cdot 2\text{H}_2\text{O}$  (red) based on models **A**, **B** and **C**, respectively. Bars indicate relative probability of electronic transitions. Symbols indicate electronic transitions with the largest contributions of: the *d-d* transitions and metal-to-ligand charge transfer (MLCT) - stars, ligand-to-ligand charge transfer (LLCT) - circles, MLCT and LLCT - down triangle, and ligand-to-metal charge transfer (LMCT).

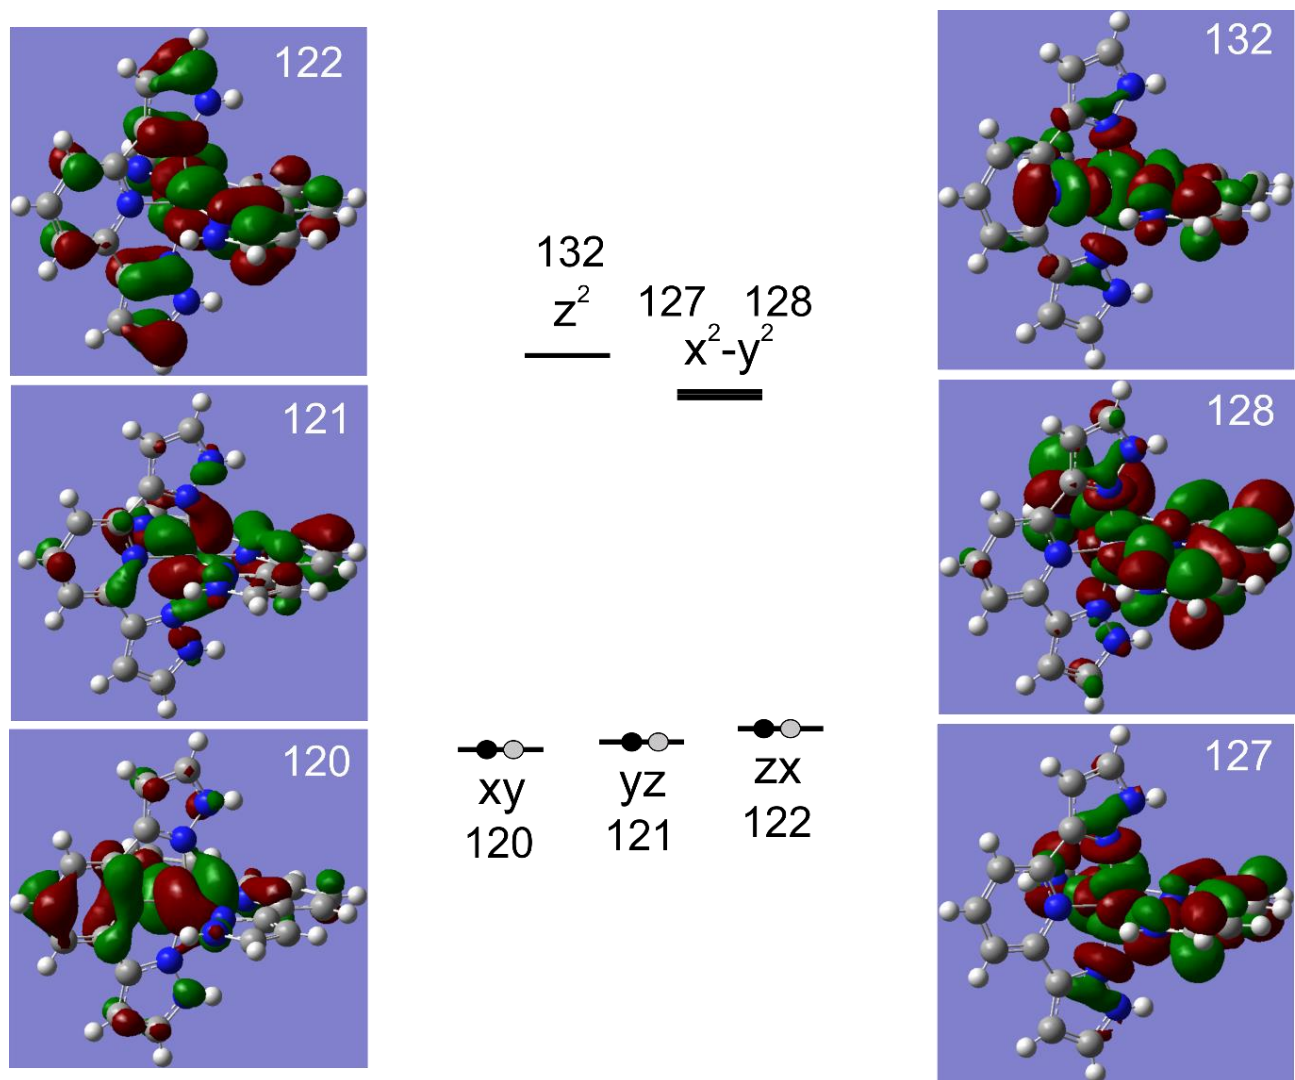

**Figure S8.** The energy level diagram with Fe *d*-based representative low spin molecular orbitals calculated for **1-sol** and **2-sol**.

List of excited state calculated for LS Fe(II)-based model **A** taken from complex **1-sol**.

|                  |           |           |           |          |              |
|------------------|-----------|-----------|-----------|----------|--------------|
| Excited State 1: | Singlet-A | 2.2226 eV | 557.84 nm | f=0.0001 | <S**2>=0.000 |
| 112 ->127        | 0.15102   |           |           |          |              |
| 118 ->127        | -0.10202  |           |           |          |              |
| 122 ->127        | 0.62113   |           |           |          |              |
| 122 ->129        | 0.19782   |           |           |          |              |
| 122 ->131        | -0.10801  |           |           |          |              |
| Excited State 2: | Singlet-A | 2.6554 eV | 466.92 nm | f=0.0037 | <S**2>=0.000 |
| 120 ->127        | 0.27607   |           |           |          |              |
| 120 ->130        | 0.22216   |           |           |          |              |
| 122 ->123        | 0.58685   |           |           |          |              |
| Excited State 3: | Singlet-A | 2.6760 eV | 463.32 nm | f=0.0029 | <S**2>=0.000 |
| 121 ->127        | 0.33888   |           |           |          |              |
| 121 ->129        | 0.14079   |           |           |          |              |
| 121 ->130        | -0.28310  |           |           |          |              |
| 121 ->131        | -0.10129  |           |           |          |              |
| 121 ->132        | 0.15090   |           |           |          |              |
| 122 ->124        | 0.46153   |           |           |          |              |



|                   |           |           |           |          |              |
|-------------------|-----------|-----------|-----------|----------|--------------|
| Excited State 4:  | Singlet-A | 2.7541 eV | 450.18 nm | f=0.0003 | <S**2>=0.000 |
| 120 ->127         | 0.28815   |           |           |          |              |
| 120 ->130         | 0.49727   |           |           |          |              |
| 120 ->132         | -0.13549  |           |           |          |              |
| 122 ->123         | -0.35553  |           |           |          |              |
| Excited State 5:  | Singlet-A | 2.7609 eV | 449.06 nm | f=0.0012 | <S**2>=0.000 |
| 121 ->127         | -0.19145  |           |           |          |              |
| 121 ->129         | -0.10221  |           |           |          |              |
| 121 ->130         | 0.37577   |           |           |          |              |
| 121 ->132         | -0.16184  |           |           |          |              |
| 122 ->124         | 0.50436   |           |           |          |              |
| Excited State 6:  | Singlet-A | 3.0546 eV | 405.90 nm | f=0.0005 | <S**2>=0.000 |
| 120 ->123         | 0.46656   |           |           |          |              |
| 121 ->124         | -0.32914  |           |           |          |              |
| 122 ->130         | 0.35447   |           |           |          |              |
| 122 ->132         | -0.12394  |           |           |          |              |
| Excited State 7:  | Singlet-A | 3.1519 eV | 393.36 nm | f=0.0000 | <S**2>=0.000 |
| 120 ->123         | 0.43792   |           |           |          |              |
| 121 ->124         | 0.53886   |           |           |          |              |
| Excited State 8:  | Singlet-A | 3.1753 eV | 390.46 nm | f=0.0027 | <S**2>=0.000 |
| 120 ->124         | 0.27398   |           |           |          |              |
| 121 ->123         | -0.27254  |           |           |          |              |
| 122 ->125         | 0.56797   |           |           |          |              |
| 122 ->126         | 0.11477   |           |           |          |              |
| Excited State 9:  | Singlet-A | 3.2854 eV | 377.38 nm | f=0.0068 | <S**2>=0.000 |
| 120 ->124         | -0.32133  |           |           |          |              |
| 121 ->123         | -0.40088  |           |           |          |              |
| 122 ->125         | -0.11361  |           |           |          |              |
| 122 ->126         | 0.44605   |           |           |          |              |
| Excited State 10: | Singlet-A | 3.3876 eV | 366.00 nm | f=0.0069 | <S**2>=0.000 |
| 120 ->125         | 0.29654   |           |           |          |              |
| 120 ->127         | 0.31088   |           |           |          |              |
| 120 ->129         | 0.12531   |           |           |          |              |
| 120 ->130         | -0.22947  |           |           |          |              |
| 120 ->132         | 0.11678   |           |           |          |              |
| 121 ->125         | 0.39210   |           |           |          |              |
| 121 ->127         | -0.15348  |           |           |          |              |
| Excited State 11: | Singlet-A | 3.4054 eV | 364.08 nm | f=0.0154 | <S**2>=0.000 |
| 120 ->125         | 0.36172   |           |           |          |              |
| 120 ->126         | 0.12111   |           |           |          |              |
| 120 ->127         | -0.11710  |           |           |          |              |
| 121 ->125         | -0.24863  |           |           |          |              |
| 121 ->126         | -0.10102  |           |           |          |              |
| 121 ->127         | -0.30987  |           |           |          |              |
| 121 ->130         | -0.28453  |           |           |          |              |
| 122 ->126         | 0.19955   |           |           |          |              |
| Excited State 12: | Singlet-A | 3.4583 eV | 358.51 nm | f=0.1549 | <S**2>=0.000 |
| 120 ->124         | 0.35233   |           |           |          |              |
| 121 ->123         | 0.31032   |           |           |          |              |
| 121 ->125         | 0.15046   |           |           |          |              |
| 122 ->126         | 0.43615   |           |           |          |              |
| Excited State 13: | Singlet-A | 3.5975 eV | 344.64 nm | f=0.0080 | <S**2>=0.000 |
| 120 ->123         | -0.26632  |           |           |          |              |
| 121 ->124         | 0.27201   |           |           |          |              |
| 122 ->126         | -0.13073  |           |           |          |              |
| 122 ->130         | 0.51952   |           |           |          |              |

|                   |           |           |           |          |              |
|-------------------|-----------|-----------|-----------|----------|--------------|
| 122 ->132         | -0.18656  |           |           |          |              |
| Excited State 14: | Singlet-A | 3.7116 eV | 334.04 nm | f=0.0020 | <S**2>=0.000 |
| 120 ->125         | 0.37352   |           |           |          |              |
| 120 ->126         | -0.19304  |           |           |          |              |
| 120 ->127         | 0.13922   |           |           |          |              |
| 121 ->125         | -0.32867  |           |           |          |              |
| 121 ->126         | 0.16365   |           |           |          |              |
| 121 ->127         | 0.28196   |           |           |          |              |
| 121 ->130         | 0.20607   |           |           |          |              |
| Excited State 15: | Singlet-A | 3.7572 eV | 329.99 nm | f=0.0016 | <S**2>=0.000 |
| 120 ->125         | 0.29848   |           |           |          |              |
| 120 ->127         | -0.33362  |           |           |          |              |
| 120 ->129         | -0.12790  |           |           |          |              |
| 120 ->130         | 0.21560   |           |           |          |              |
| 120 ->132         | -0.12495  |           |           |          |              |
| 121 ->125         | 0.34634   |           |           |          |              |
| 121 ->127         | 0.13787   |           |           |          |              |
| 121 ->130         | 0.12888   |           |           |          |              |
| Excited State 16: | Singlet-A | 3.7720 eV | 328.70 nm | f=0.0034 | <S**2>=0.000 |
| 118 ->123         | 0.11036   |           |           |          |              |
| 119 ->123         | 0.11470   |           |           |          |              |
| 120 ->125         | -0.10251  |           |           |          |              |
| 120 ->126         | 0.19889   |           |           |          |              |
| 121 ->125         | -0.10723  |           |           |          |              |
| 121 ->126         | 0.62054   |           |           |          |              |
| Excited State 17: | Singlet-A | 3.8240 eV | 324.23 nm | f=0.0010 | <S**2>=0.000 |
| 120 ->126         | 0.62173   |           |           |          |              |
| 121 ->126         | -0.14373  |           |           |          |              |
| 121 ->127         | 0.17501   |           |           |          |              |
| 121 ->130         | 0.14680   |           |           |          |              |

List of excited state calculated for LS Fe(II)-based model **B** taken from complex **2-sol**.

|                  |           |           |           |          |              |
|------------------|-----------|-----------|-----------|----------|--------------|
| Excited State 1: | Singlet-A | 2.1807 eV | 568.56 nm | f=0.0000 | <S**2>=0.000 |
| 112 ->127        | 0.14573   |           |           |          |              |
| 122 ->127        | 0.57693   |           |           |          |              |
| 122 ->128        | 0.32367   |           |           |          |              |
| 122 ->129        | -0.11194  |           |           |          |              |
| Excited State 2: | Singlet-A | 2.6298 eV | 471.46 nm | f=0.0040 | <S**2>=0.000 |
| 120 ->127        | 0.25406   |           |           |          |              |
| 120 ->128        | 0.13572   |           |           |          |              |
| 120 ->132        | -0.13052  |           |           |          |              |
| 121 ->132        | -0.14446  |           |           |          |              |
| 122 ->123        | 0.53761   |           |           |          |              |
| 122 ->124        | -0.26630  |           |           |          |              |
| Excited State 3: | Singlet-A | 2.6543 eV | 467.11 nm | f=0.0028 | <S**2>=0.000 |
| 120 ->132        | -0.20712  |           |           |          |              |
| 121 ->127        | 0.30918   |           |           |          |              |
| 121 ->128        | 0.18520   |           |           |          |              |
| 121 ->132        | 0.21318   |           |           |          |              |
| 122 ->123        | 0.24754   |           |           |          |              |
| 122 ->124        | 0.41446   |           |           |          |              |
| Excited State 4: | Singlet-A | 2.7362 eV | 453.13 nm | f=0.0006 | <S**2>=0.000 |
| 120 ->127        | -0.15838  |           |           |          |              |
| 120 ->130        | -0.14678  |           |           |          |              |

|                   |           |           |           |          |              |
|-------------------|-----------|-----------|-----------|----------|--------------|
| 120 ->132         | 0.46141   |           |           |          |              |
| 121 ->127         | -0.19564  |           |           |          |              |
| 121 ->128         | -0.10723  |           |           |          |              |
| 122 ->123         | 0.35264   |           |           |          |              |
| 122 ->124         | 0.19617   |           |           |          |              |
| Excited State 5:  | Singlet-A | 2.7465 eV | 451.43 nm | f=0.0008 | <S**2>=0.000 |
| 120 ->127         | 0.21372   |           |           |          |              |
| 120 ->128         | 0.11743   |           |           |          |              |
| 121 ->130         | 0.14358   |           |           |          |              |
| 121 ->132         | -0.42926  |           |           |          |              |
| 122 ->124         | 0.44289   |           |           |          |              |
| Excited State 6:  | Singlet-A | 3.0260 eV | 409.72 nm | f=0.0001 | <S**2>=0.000 |
| 120 ->123         | 0.45014   |           |           |          |              |
| 121 ->123         | 0.17790   |           |           |          |              |
| 121 ->124         | -0.33150  |           |           |          |              |
| 122 ->130         | 0.11955   |           |           |          |              |
| 122 ->132         | -0.34692  |           |           |          |              |
| Excited State 7:  | Singlet-A | 3.1169 eV | 397.77 nm | f=0.0000 | <S**2>=0.000 |
| 120 ->123         | 0.30425   |           |           |          |              |
| 120 ->124         | -0.35251  |           |           |          |              |
| 121 ->123         | 0.29359   |           |           |          |              |
| 121 ->124         | 0.42959   |           |           |          |              |
| Excited State 8:  | Singlet-A | 3.1913 eV | 388.51 nm | f=0.0012 | <S**2>=0.000 |
| 120 ->123         | -0.23674  |           |           |          |              |
| 120 ->124         | -0.16867  |           |           |          |              |
| 121 ->123         | 0.26729   |           |           |          |              |
| 121 ->124         | -0.12698  |           |           |          |              |
| 122 ->125         | 0.56711   |           |           |          |              |
| Excited State 9:  | Singlet-A | 3.2852 eV | 377.41 nm | f=0.0225 | <S**2>=0.000 |
| 120 ->124         | 0.41406   |           |           |          |              |
| 121 ->123         | 0.37345   |           |           |          |              |
| 121 ->124         | 0.12040   |           |           |          |              |
| 122 ->126         | 0.39435   |           |           |          |              |
| Excited State 10: | Singlet-A | 3.4002 eV | 364.63 nm | f=0.0045 | <S**2>=0.000 |
| 120 ->127         | -0.34556  |           |           |          |              |
| 120 ->128         | -0.19989  |           |           |          |              |
| 120 ->132         | -0.12863  |           |           |          |              |
| 121 ->125         | 0.45554   |           |           |          |              |
| 121 ->130         | 0.14467   |           |           |          |              |
| 121 ->132         | -0.23827  |           |           |          |              |
| Excited State 11: | Singlet-A | 3.4234 eV | 362.17 nm | f=0.0076 | <S**2>=0.000 |
| 120 ->125         | 0.43477   |           |           |          |              |
| 120 ->132         | 0.28703   |           |           |          |              |
| 121 ->127         | 0.34396   |           |           |          |              |
| 121 ->128         | 0.18084   |           |           |          |              |
| 121 ->132         | -0.16296  |           |           |          |              |
| 122 ->126         | -0.12676  |           |           |          |              |
| Excited State 12: | Singlet-A | 3.4606 eV | 358.27 nm | f=0.1590 | <S**2>=0.000 |
| 120 ->123         | 0.11978   |           |           |          |              |
| 120 ->124         | -0.23843  |           |           |          |              |
| 120 ->125         | 0.10090   |           |           |          |              |
| 121 ->123         | -0.25863  |           |           |          |              |
| 121 ->124         | -0.13309  |           |           |          |              |
| 122 ->126         | 0.55495   |           |           |          |              |
| Excited State 13: | Singlet-A | 3.5714 eV | 347.16 nm | f=0.0035 | <S**2>=0.000 |
| 120 ->123         | 0.25045   |           |           |          |              |

|                   |           |           |           |          |              |
|-------------------|-----------|-----------|-----------|----------|--------------|
| 120 ->124         | 0.11860   |           |           |          |              |
| 121 ->124         | -0.24810  |           |           |          |              |
| 122 ->130         | -0.18151  |           |           |          |              |
| 122 ->132         | 0.53626   |           |           |          |              |
| Excited State 14: | Singlet-A | 3.7304 eV | 332.36 nm | f=0.0040 | <S**2>=0.000 |
| 118 ->123         | -0.10426  |           |           |          |              |
| 120 ->125         | 0.36391   |           |           |          |              |
| 120 ->127         | -0.18305  |           |           |          |              |
| 120 ->128         | -0.11334  |           |           |          |              |
| 120 ->132         | -0.21194  |           |           |          |              |
| 121 ->125         | -0.33265  |           |           |          |              |
| 121 ->126         | -0.23969  |           |           |          |              |
| 121 ->127         | -0.20311  |           |           |          |              |
| 121 ->128         | -0.11523  |           |           |          |              |
| Excited State 15: | Singlet-A | 3.7513 eV | 330.51 nm | f=0.0016 | <S**2>=0.000 |
| 120 ->125         | 0.34634   |           |           |          |              |
| 120 ->127         | 0.22748   |           |           |          |              |
| 120 ->128         | 0.12424   |           |           |          |              |
| 121 ->125         | 0.37904   |           |           |          |              |
| 121 ->127         | -0.19390  |           |           |          |              |
| 121 ->132         | 0.27152   |           |           |          |              |
| Excited State 16: | Singlet-A | 3.7956 eV | 326.65 nm | f=0.0015 | <S**2>=0.000 |
| 120 ->125         | 0.10041   |           |           |          |              |
| 120 ->126         | -0.27997  |           |           |          |              |
| 121 ->125         | -0.13048  |           |           |          |              |
| 121 ->126         | 0.58783   |           |           |          |              |
| Excited State 17: | Singlet-A | 3.8110 eV | 325.33 nm | f=0.0015 | <S**2>=0.000 |
| 120 ->125         | 0.13588   |           |           |          |              |
| 120 ->126         | 0.61862   |           |           |          |              |
| 121 ->126         | 0.24556   |           |           |          |              |

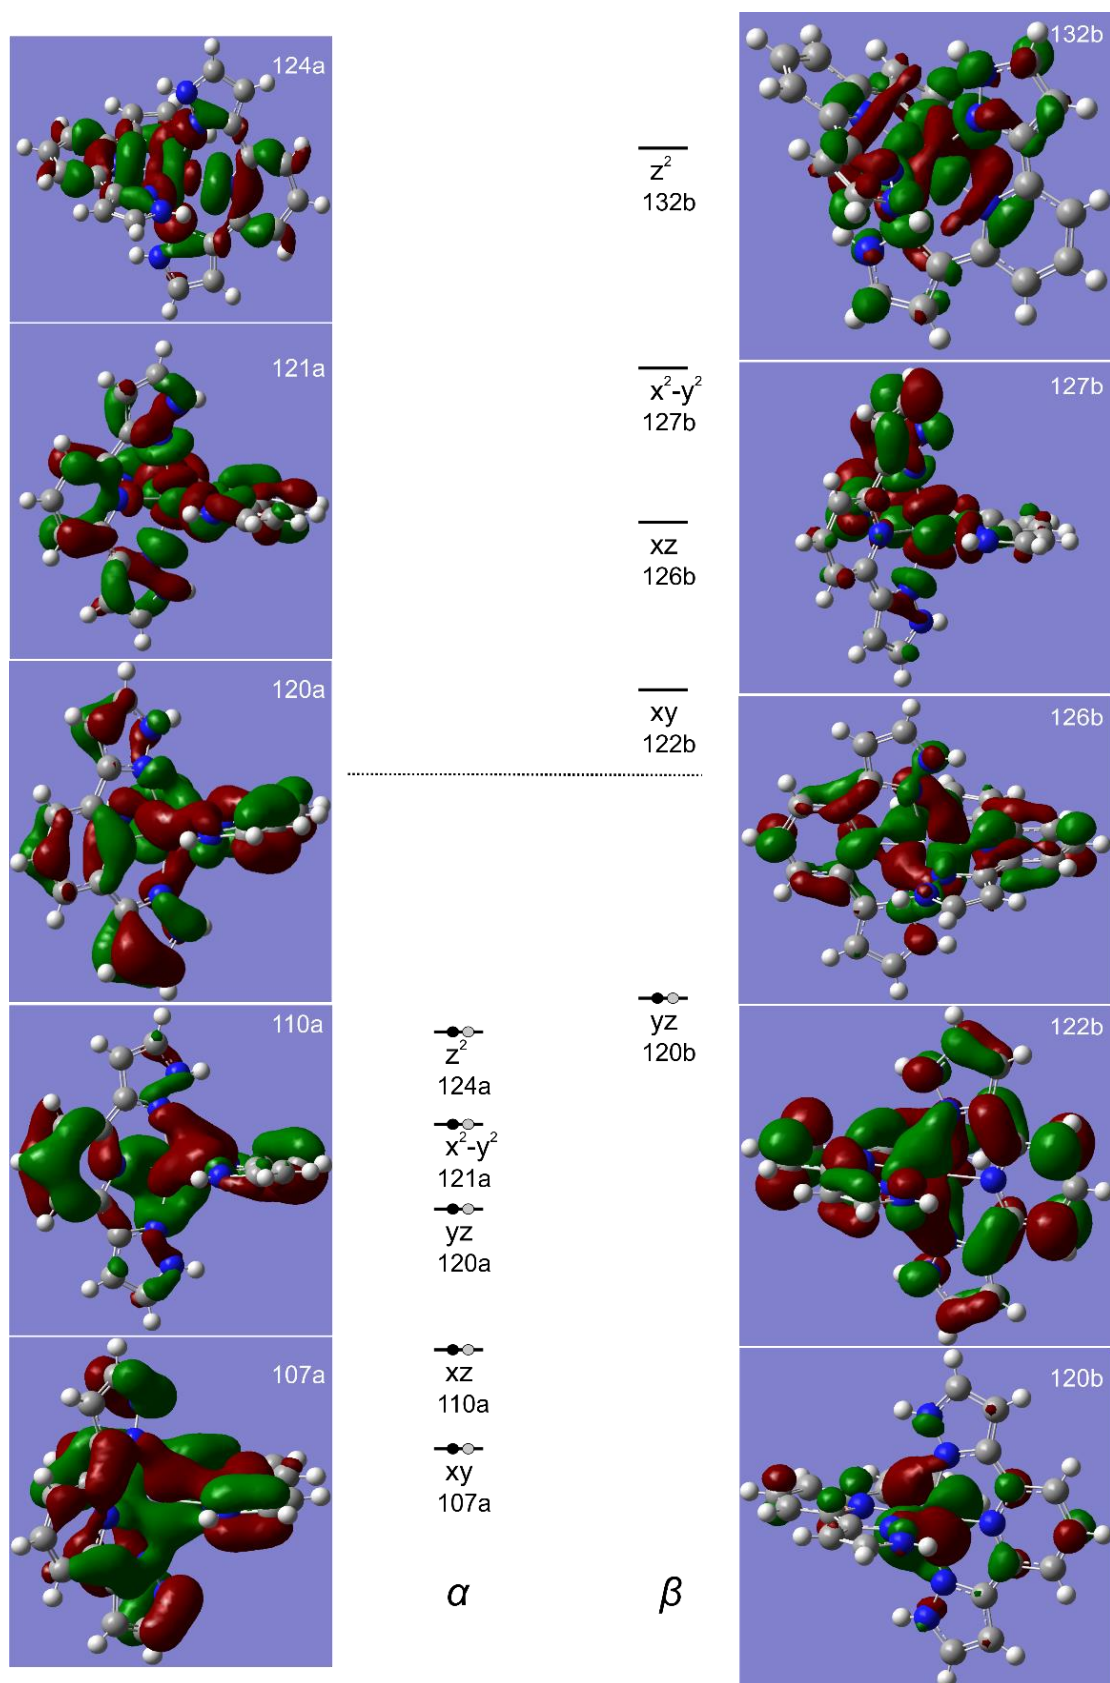

**Figure S9.** The energy level diagram with Fe *d*-based representative high spin molecular orbitals calculated for input file taken from reference R2.

List of excited state calculated for HS Fe(II)-based model **C** taken from reference **R2**.

Excited State 1: 5.017-A 0.1740 eV 7124.97 nm f=0.0004 <S\*\*2>=6.042  
120B ->121B 0.74774  
120B ->126B 0.67968  
120B <-121B 0.15524  
120B <-126B 0.15702

Excited State 2: 5.011-A 0.2950 eV 4203.22 nm f=0.0002 <S\*\*2>=6.028  
120B ->122B 0.75908  
120B ->123B 0.13318  
120B ->125B 0.57158  
120B ->131B 0.16578  
120B ->132B 0.18888

Excited State 3: 5.000-A 1.7155 eV 722.72 nm f=0.0001 <S\*\*2>=6.000  
120B ->127B 0.84813  
120B ->128B 0.47661  
120B ->130B -0.15646

Excited State 4: 5.003-A 2.1313 eV 581.72 nm f=0.0000 <S\*\*2>=6.007  
120B ->125B -0.16668  
120B ->131B -0.41475  
120B ->132B 0.81282  
120B ->133B -0.16079  
120B ->135B -0.29016

Excited State 5: 5.455-A 2.3575 eV 525.91 nm f=0.0003 <S\*\*2>=7.188  
120A ->126A -0.10392  
120B ->122B -0.18688  
120B ->123B 0.95429

Excited State 6: 5.408-A 2.3961 eV 517.45 nm f=0.0299 <S\*\*2>=7.062  
120B ->121B -0.66704  
120B ->124B -0.14861  
120B ->126B 0.70549

Excited State 7: 5.118-A 2.6596 eV 466.17 nm f=0.0002 <S\*\*2>=6.300  
124A ->125A 0.97989

Excited State 8: 5.110-A 2.6829 eV 462.12 nm f=0.0000 <S\*\*2>=6.279  
124A ->126A 0.96370  
124A ->127A 0.16774

Excited State 9: 5.396-A 2.7612 eV 449.02 nm f=0.0034 <S\*\*2>=7.029  
120B ->122B -0.61494  
120B ->123B -0.12213  
120B ->125B 0.73614  
120B ->132B 0.16750

Excited State 10: 5.397-A 2.7671 eV 448.06 nm f=0.0040 <S\*\*2>=7.032  
120B ->124B 0.97645  
120B ->126B 0.15656

Excited State 11: 5.688-A 2.9102 eV 426.03 nm f=0.0039 <S\*\*2>=7.839  
115A ->126A -0.13831  
116A ->125A -0.12369  
121A ->126A 0.15024  
121A ->127A -0.14218  
122A ->125A -0.27309  
122A ->128A 0.31079  
123A ->126A -0.27384  
123A ->127A 0.28160  
113B ->121B -0.10377  
115B ->123B -0.11020  
116B ->121B 0.13218

|                   |          |                                           |
|-------------------|----------|-------------------------------------------|
| 118B ->121B       | 0.31784  |                                           |
| 118B ->124B       | 0.30272  |                                           |
| 119B ->122B       | 0.46728  |                                           |
| 119B ->123B       | -0.17908 |                                           |
| 119B ->125B       | -0.12489 |                                           |
| 120B ->121B       | 0.10169  |                                           |
| 120B ->126B       | -0.10172 |                                           |
| Excited State 12: | 5.683-A  | 2.9114 eV 425.86 nm f=0.0001 <S**2>=7.824 |
| 115A ->125A       | 0.13255  |                                           |
| 116A ->126A       | 0.12411  |                                           |
| 121A ->125A       | -0.15074 |                                           |
| 121A ->128A       | 0.13270  |                                           |
| 122A ->126A       | 0.32575  |                                           |
| 122A ->127A       | -0.28900 |                                           |
| 123A ->125A       | 0.24491  |                                           |
| 123A ->128A       | -0.27338 |                                           |
| 124A ->127A       | 0.14401  |                                           |
| 115B ->121B       | 0.13863  |                                           |
| 116B ->123B       | -0.10254 |                                           |
| 118B ->122B       | 0.39542  |                                           |
| 118B ->123B       | -0.18495 |                                           |
| 118B ->125B       | -0.11517 |                                           |
| 119B ->121B       | 0.39630  |                                           |
| 119B ->124B       | 0.31628  |                                           |
| 120B ->123B       | -0.12038 |                                           |
| Excited State 13: | 5.340-A  | 3.1102 eV 398.63 nm f=0.0006 <S**2>=6.880 |
| 122A ->126A       | -0.17189 |                                           |
| 122A ->127A       | -0.14755 |                                           |
| 123A ->125A       | -0.17677 |                                           |
| 123A ->128A       | -0.16238 |                                           |
| 124A ->126A       | -0.16288 |                                           |
| 124A ->127A       | 0.72705  |                                           |
| 118B ->122B       | 0.14282  |                                           |
| 118B ->123B       | 0.17216  |                                           |
| 119B ->121B       | -0.45132 |                                           |
| 119B ->124B       | 0.13013  |                                           |
| Excited State 14: | 5.605-A  | 3.1658 eV 391.63 nm f=0.0024 <S**2>=7.604 |
| 121A ->126A       | 0.11651  |                                           |
| 122A ->125A       | -0.31560 |                                           |
| 122A ->128A       | -0.21093 |                                           |
| 123A ->126A       | -0.24440 |                                           |
| 123A ->127A       | -0.25443 |                                           |
| 124A ->128A       | 0.23204  |                                           |
| 118B ->121B       | 0.58741  |                                           |
| 118B ->124B       | -0.17179 |                                           |
| 119B ->122B       | -0.26724 |                                           |
| 119B ->123B       | -0.30591 |                                           |
| Excited State 15: | 5.394-A  | 3.1719 eV 390.89 nm f=0.0009 <S**2>=7.024 |
| 121A ->128A       | -0.16411 |                                           |
| 122A ->126A       | 0.12141  |                                           |
| 122A ->127A       | 0.27260  |                                           |
| 123A ->125A       | 0.13849  |                                           |
| 123A ->128A       | 0.16938  |                                           |
| 124A ->127A       | 0.63281  |                                           |
| 118B ->122B       | -0.25108 |                                           |
| 118B ->123B       | -0.15477 |                                           |

|                   |          |           |           |                       |
|-------------------|----------|-----------|-----------|-----------------------|
| 119B ->121B       | 0.44897  |           |           |                       |
| 119B ->124B       | -0.21005 |           |           |                       |
| Excited State 16: | 5.134-A  | 3.2718 eV | 378.95 nm | f=0.0017 <S**2>=6.339 |
| 121A ->127A       | -0.15791 |           |           |                       |
| 122A ->128A       | 0.10457  |           |           |                       |
| 124A ->128A       | 0.94909  |           |           |                       |
| 118B ->121B       | -0.12656 |           |           |                       |
| 119B ->122B       | 0.11411  |           |           |                       |
| Excited State 17: | 5.097-A  | 3.5884 eV | 345.52 nm | f=0.0005 <S**2>=6.244 |
| 121A ->125A       | 0.75353  |           |           |                       |
| 122A ->126A       | 0.11324  |           |           |                       |
| 123A ->125A       | 0.60398  |           |           |                       |
| 124A ->126A       | 0.11127  |           |           |                       |
| 119B ->121B       | -0.14660 |           |           |                       |
| Excited State 18: | 5.083-A  | 3.6138 eV | 343.09 nm | f=0.0002 <S**2>=6.210 |
| 121A ->126A       | 0.87331  |           |           |                       |
| 121A ->127A       | 0.11538  |           |           |                       |
| 122A ->125A       | -0.12058 |           |           |                       |
| 123A ->126A       | 0.41435  |           |           |                       |
| 124A ->125A       | 0.11309  |           |           |                       |
| Excited State 19: | 5.228-A  | 3.6967 eV | 335.39 nm | f=0.0574 <S**2>=6.583 |
| 121A ->125A       | 0.43302  |           |           |                       |
| 122A ->126A       | -0.41232 |           |           |                       |
| 122A ->127A       | -0.14213 |           |           |                       |
| 123A ->125A       | -0.27842 |           |           |                       |
| 118B ->123B       | 0.26182  |           |           |                       |
| 119B ->121B       | 0.62326  |           |           |                       |
| 119B ->126B       | 0.13319  |           |           |                       |
| Excited State 20: | 5.255-A  | 3.7120 eV | 334.01 nm | f=0.0587 <S**2>=6.654 |
| 118A ->125A       | 0.10228  |           |           |                       |
| 122A ->125A       | 0.38586  |           |           |                       |
| 123A ->126A       | 0.37951  |           |           |                       |
| 115B ->122B       | -0.10462 |           |           |                       |
| 116B ->124B       | -0.11912 |           |           |                       |
| 118B ->121B       | 0.70500  |           |           |                       |
| 118B ->126B       | 0.10910  |           |           |                       |
| 119B ->123B       | 0.27478  |           |           |                       |



## Single crystal X-ray diffraction (SCXRD) studies

**Table S1.** Selected crystallographic parameters for **1·sol** and **2·sol**.

|                                                                                      | <b>1·sol</b>                                                                            | <b>2·sol</b>                                                                            |
|--------------------------------------------------------------------------------------|-----------------------------------------------------------------------------------------|-----------------------------------------------------------------------------------------|
| Formula                                                                              | C <sub>22.5</sub> H <sub>20</sub> Cl <sub>2</sub> FeN <sub>10</sub> O <sub>11</sub>     | C <sub>22</sub> H <sub>24</sub> FeN <sub>10</sub> O <sub>11</sub> Re <sub>2</sub>       |
| <i>M<sub>w</sub></i> (g/mol)                                                         | 733.23                                                                                  | 1032.76                                                                                 |
| <i>T</i> (K)                                                                         | 90(2)                                                                                   | 250(2)                                                                                  |
| Crystal system, space group                                                          | Triclinic, <i>P</i> -1                                                                  | Triclinic, <i>P</i> -1                                                                  |
| <i>a</i> (Å)                                                                         | 8.2930(5)                                                                               | 11.6404(4)                                                                              |
| <i>b</i> (Å)                                                                         | 8.3598(6)                                                                               | 11.8143(4)                                                                              |
| <i>c</i> (Å)                                                                         | 21.9377(13)                                                                             | 11.9919(4)                                                                              |
| $\alpha$ (°)                                                                         | 81.870(6)                                                                               | 107.9610(10)                                                                            |
| $\beta$ (°)                                                                          | 89.641(6)                                                                               | 99.9260(10)                                                                             |
| $\gamma$ (°)                                                                         | 89.552(6)                                                                               | 91.0420(10)                                                                             |
| <i>V</i> (Å <sup>3</sup> )                                                           | 1505.54(17)                                                                             | 1540.83(9)                                                                              |
| <i>Z</i>                                                                             | 2                                                                                       | 2                                                                                       |
| $\rho_{\text{calc}}$ (g/cm <sup>3</sup> )                                            | 1.617                                                                                   | 2.226                                                                                   |
| $\mu$ (mm <sup>-1</sup> )                                                            | 0.753                                                                                   | 8.374                                                                                   |
| <i>F</i> (000)                                                                       | 746                                                                                     | 980                                                                                     |
| Crystal size (mm <sup>3</sup> )                                                      | 0.262 × 0.174 × 0.100                                                                   | 0.314 × 0.120 × 0.111                                                                   |
| Radiation                                                                            | MoK $\alpha$ ( $\lambda$ = 0.71075)                                                     | MoK $\alpha$ ( $\lambda$ = 0.71075)                                                     |
| 2 $\theta$ range (°)                                                                 | 6.198 to 54.97                                                                          | 4.25 to 55.064                                                                          |
| Index ranges                                                                         | -10 ≤ <i>h</i> ≤ 9,<br>-10 ≤ <i>k</i> ≤ 10,<br>-28 ≤ <i>l</i> ≤ 28                      | -15 ≤ <i>h</i> ≤ 15,<br>-15 ≤ <i>k</i> ≤ 14,<br>-15 ≤ <i>l</i> ≤ 15                     |
| Reflections collected / unique                                                       | 14694 / 6865<br>[ <i>R</i> <sub>int</sub> = 0.0588, <i>R</i> <sub>sigma</sub> = 0.0812] | 38720 / 7089<br>[ <i>R</i> <sub>int</sub> = 0.0318, <i>R</i> <sub>sigma</sub> = 0.0264] |
| Refinement method                                                                    | Full-matrix least-squares on <i>F</i> <sup>2</sup>                                      | Full-matrix least-squares on <i>F</i> <sup>2</sup>                                      |
| Data/restraints/parameters                                                           | 6865/148/500                                                                            | 7089/0/424                                                                              |
| GOF on <i>F</i> <sup>2</sup>                                                         | 1.205                                                                                   | 1.097                                                                                   |
| <i>R</i> <sub>1</sub> / <i>wR</i> <sub>2</sub> ( <i>I</i> > 2 $\sigma$ ( <i>I</i> )) | 0.1084/0.2077                                                                           | 0.0357/0.0912                                                                           |
| <i>R</i> <sub>1</sub> / <i>wR</i> <sub>2</sub> (all data)                            | 0.1339/0.2198                                                                           | 0.0504/0.0992                                                                           |
| Largest diff. peak and hole (e/Å <sup>3</sup> )                                      | 1.28/-0.94                                                                              | 2.15/-2.61                                                                              |
| CCDC number                                                                          |                                                                                         |                                                                                         |

**Table S2.** Selected bond lengths and angles for **1·sol** and **2·sol**.

|                                                          | <b>1·sol</b>    | <b>2·sol</b>    |
|----------------------------------------------------------|-----------------|-----------------|
| Bond lengths (Å)                                         |                 |                 |
| Fe1-N1 <sub>pyr</sub>                                    | 1.951(5)        | 1.959(5)        |
| Fe1-N2 <sub>py</sub>                                     | 1.930(5)        | 1.920(5)        |
| Fe1-N3 <sub>pyr</sub>                                    | 1.955(5)        | 1.963(5)        |
| Fe1-N4 <sub>pyr</sub>                                    | 1.957(4)        | 1.961(5)        |
| Fe1-N5 <sub>py</sub>                                     | 1.921(5)        | 1.928(5)        |
| Fe1-N6 <sub>pyr</sub>                                    | 1.952(4)        | 1.965(5)        |
| <b>Fe-N<sub>aver</sub></b>                               | <b>1.944(5)</b> | <b>1.949(5)</b> |
| Angles (°)                                               |                 |                 |
| N1 <sub>pyr</sub> -Fe1-N2 <sub>py</sub>                  | 78.9(2)         | 79.4(2)         |
| N2 <sub>py</sub> -Fe1-N3 <sub>pyr</sub>                  | 79.4(2)         | 79.7(2)         |
| N4 <sub>pyr</sub> -Fe1-N5 <sub>py</sub>                  | 79.3(2)         | 79.3(2)         |
| N5 <sub>py</sub> -Fe1-N6 <sub>pyr</sub>                  | 79.2(2)         | 79.4(2)         |
| (N <sub>pyr</sub> -Fe-N <sub>py</sub> ) <sub>aver</sub>  | 79.2(2)         | 79.5(2)         |
| N1 <sub>pyr</sub> -Fe1-N4 <sub>pyr</sub>                 | 91.79(19)       | 91.6(2)         |
| N1 <sub>pyr</sub> -Fe1-N6 <sub>pyr</sub>                 | 91.96(19)       | 91.3(2)         |
| N3 <sub>pyr</sub> -Fe1-N4 <sub>pyr</sub>                 | 92.55(19)       | 92.0(2)         |
| N3 <sub>pyr</sub> -Fe1-N6 <sub>pyr</sub>                 | 91.73(19)       | 92.8(2)         |
| (N <sub>pyr</sub> -Fe-N <sub>pyr</sub> ) <sub>aver</sub> | 92.00(19)       | 91.9(2)         |

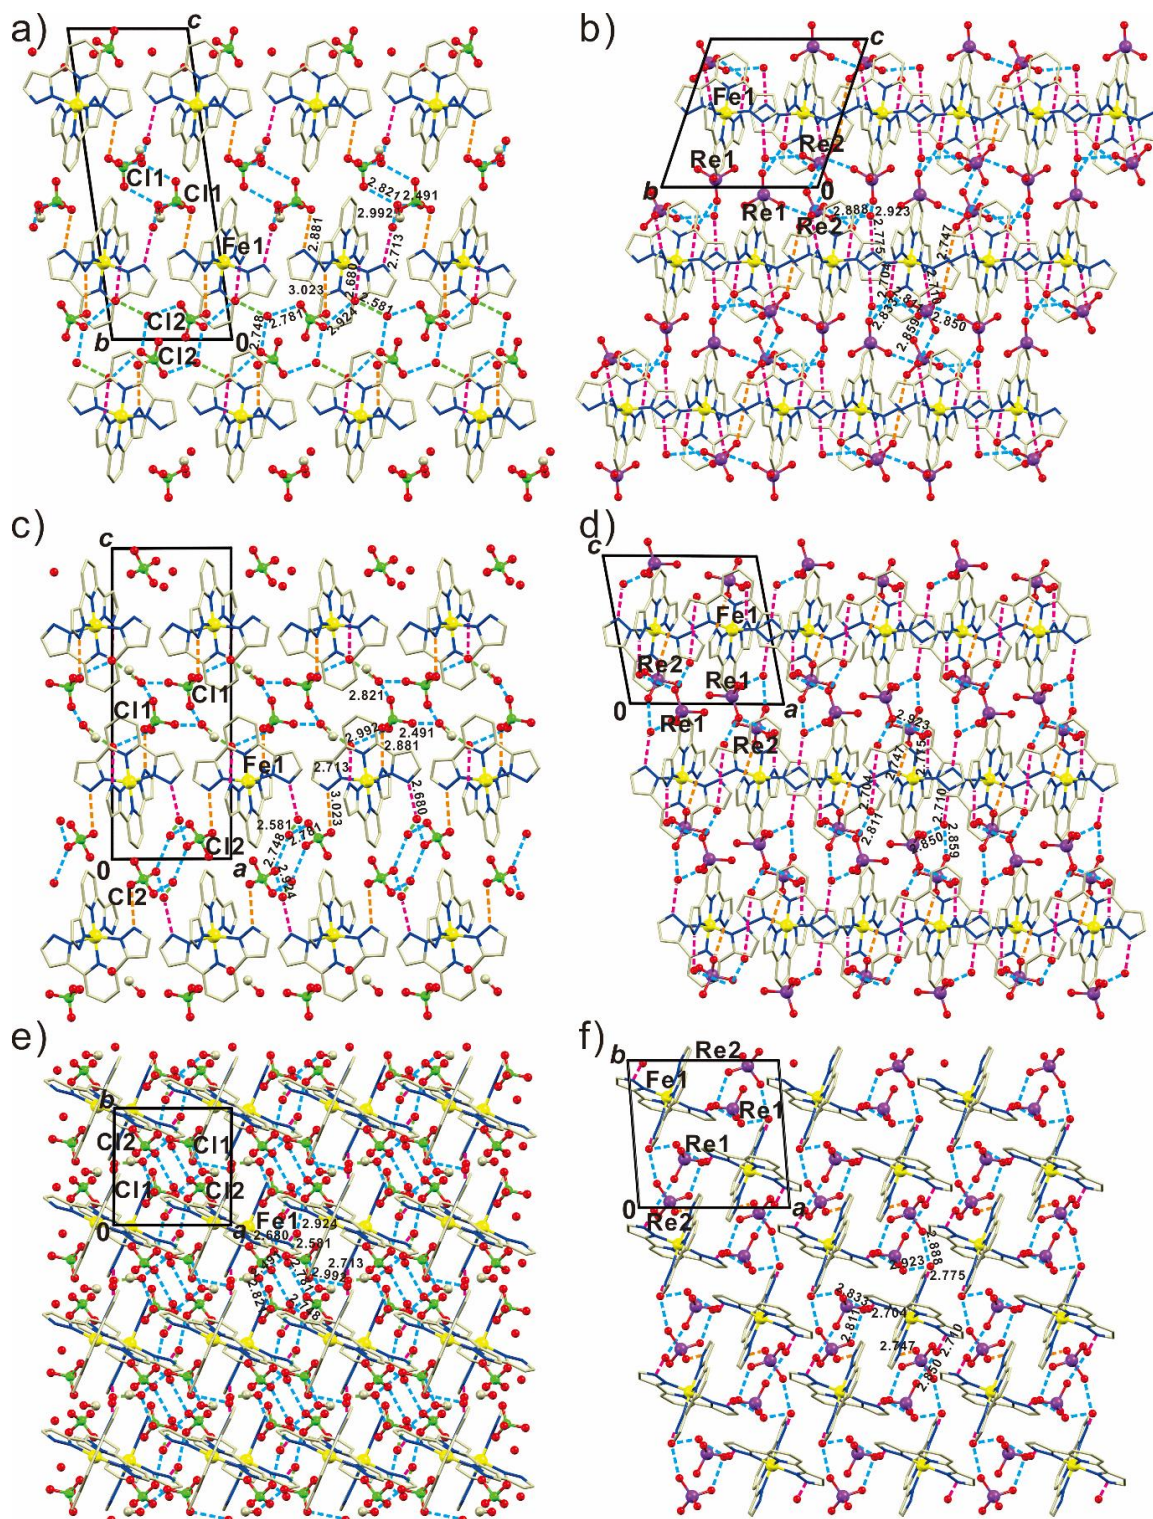

**Figure S10.** Packing along crystallographic directions (100) (a for **1-sol** and b for **2-sol**), (010) (c for **1-sol** and d for **2-sol**), and (001) (e for **1-sol** and f for **2-sol**) including a hydrogen bond networks between 3-bpp and  $\text{XO}_4^-$  anions (orange dashed lines), 3-bpp and water molecules (magenta dashed lines), water molecules and  $\text{XO}_4^-$  anions (blue dashed lines), and in solvent molecules (green dashed lines). The numbers correspond to the distances between the hydrogen bond donor and acceptor. For clarity, hydrogen atoms have been omitted.

## Powder X-ray diffraction (PXRD) studies

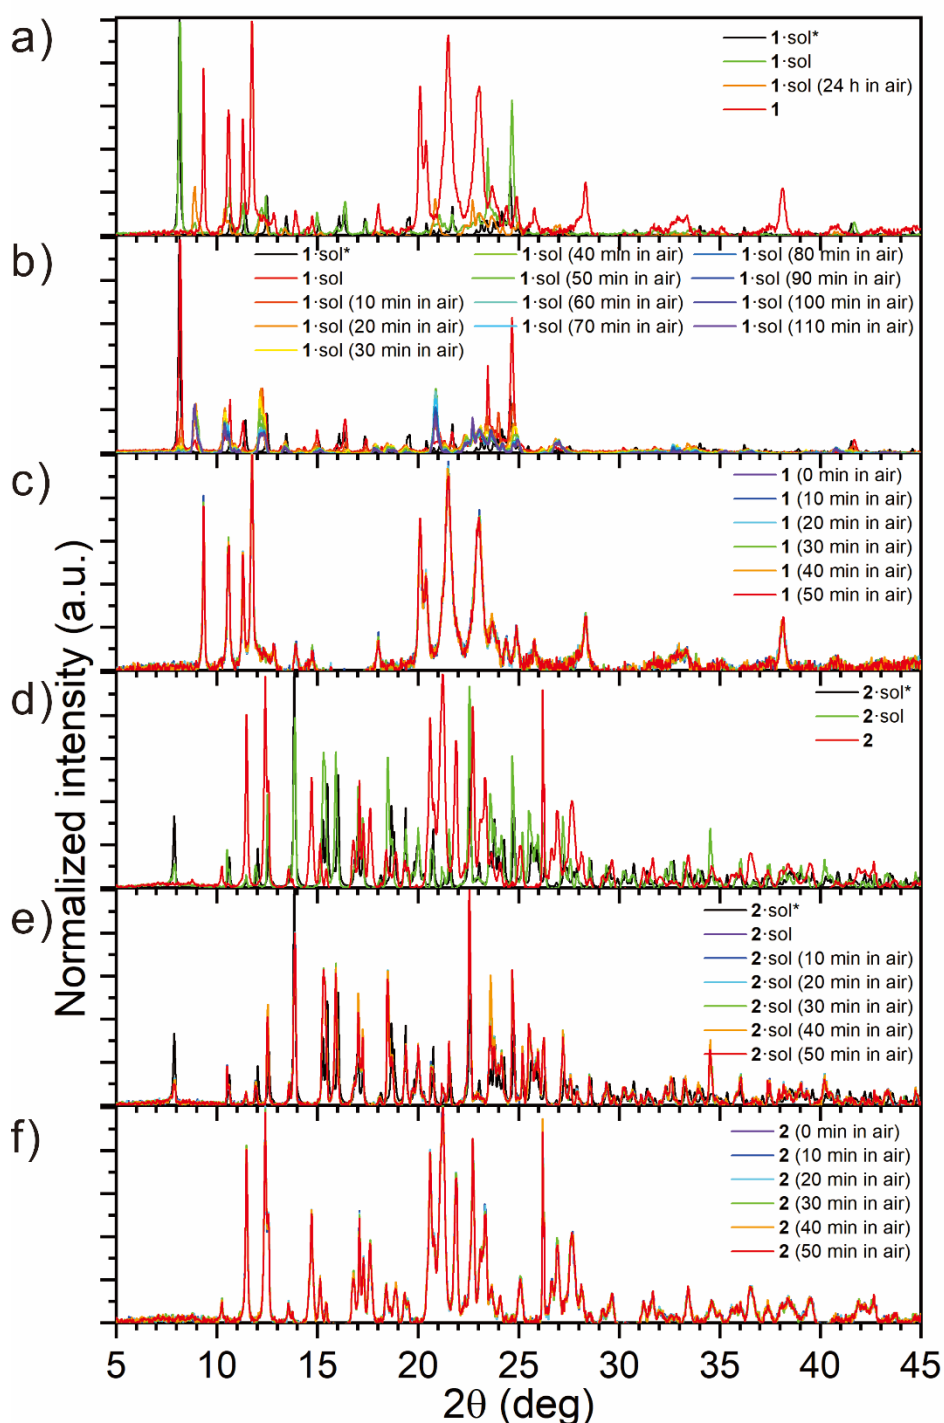

**Figure S11.** (a) Experimental PXRD patterns of **1·sol** (pristine, after 24 h in dry air, and 2 h heated at 120°C) and calculated from single-crystal X-ray diffraction data including texture effect with preferred platy orientation along (002) direction with March-Dollase parameter  $M/D = 0.6$  (**1·sol\***). (b) Time-evolution of diffractograms of pristine **1·sol**. (c) Time-evolution of PXRD patterns of desolvated **1** (2 h heated at 120°C). (d) Experimental PXRD patterns of **2·sol** (pristine and 2 h heated at 120°C) and calculated from single-crystal X-ray diffraction data (**2·sol\***). (e) Time-evolution of diffractograms of pristine **2·sol**. (f) Time-evolution of PXRD patterns of desolvated **2** (2 h heated at 120°C).

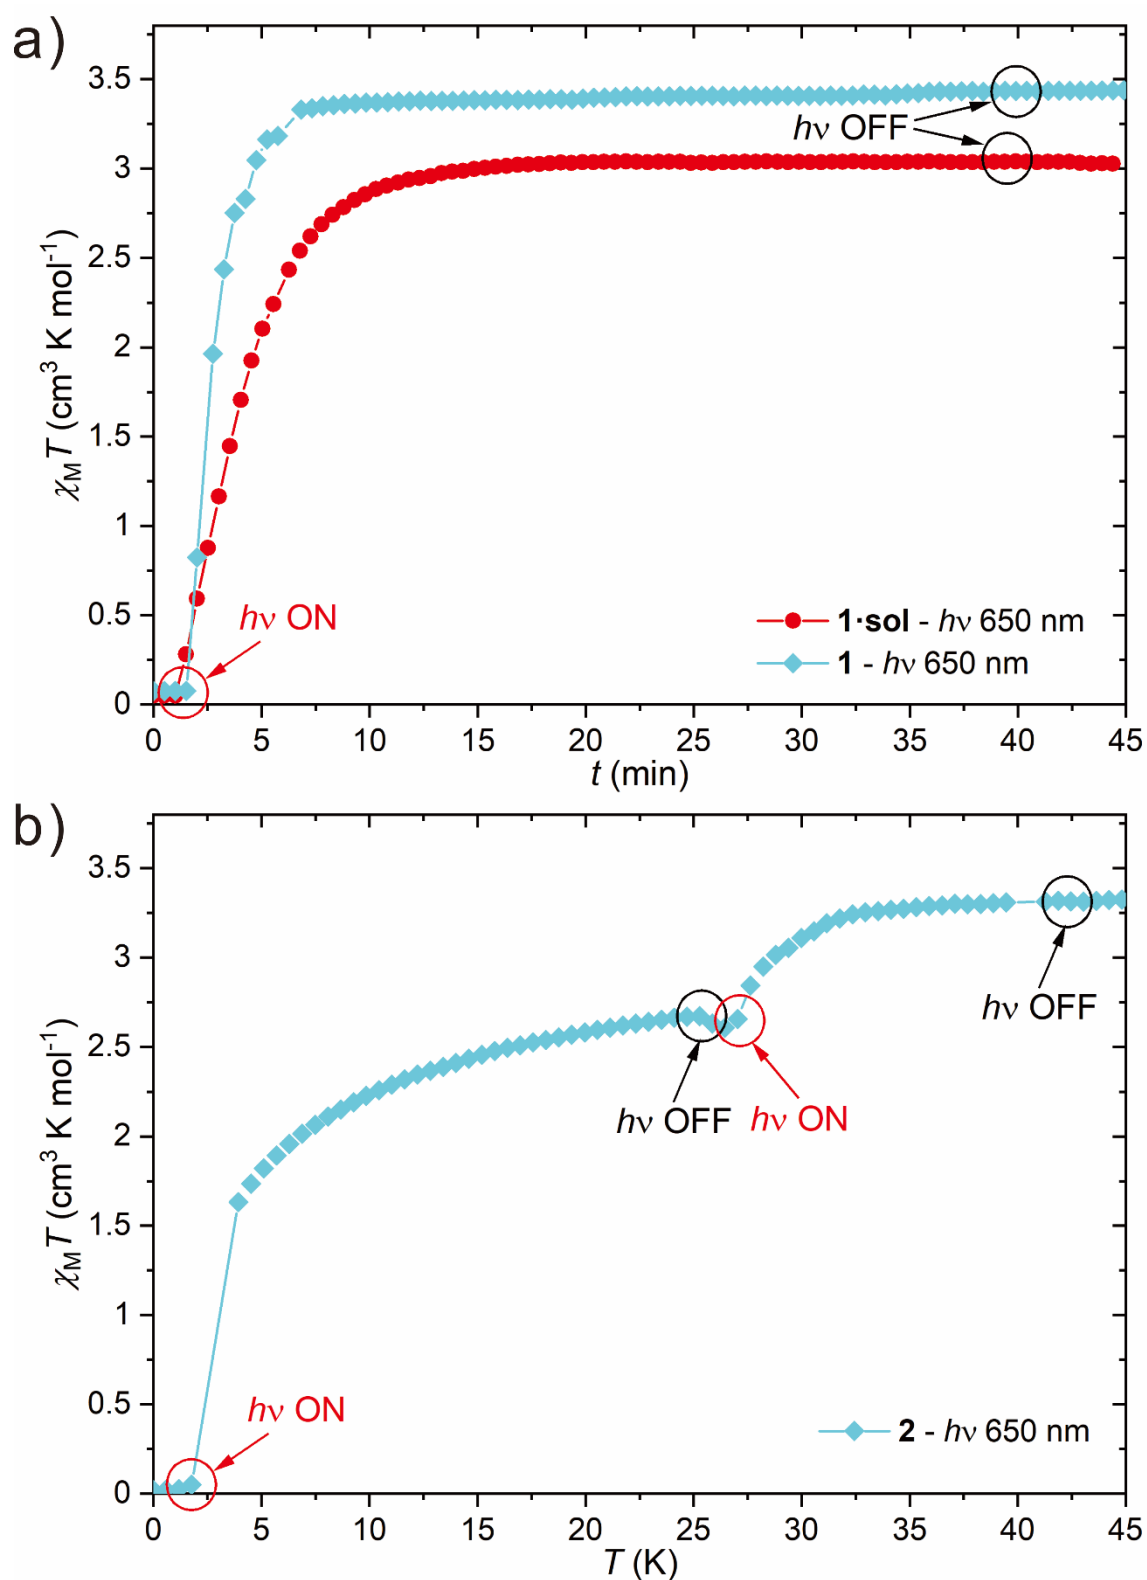

**Figure S12.** Time dependence of  $\chi_M T$  at  $H_{dc} = 10 \text{ kOe}$  during excitation at  $10 \text{ K}$  with  $650 \text{ nm}$  light ( $P = 5 \text{ mW/cm}^2$ ) for pristine (**1-sol**) and desolvated phases (**1** and **2**).
